# Supplementary material for: Reprogramming an RNA-guided archaeal TnpB endonuclease for genome editing
Source: Springer Nature journal article supplement (doi:10.1038/s41421-023-00615-2), 2023-11-11
Supplement: MOESM1 [file 41421_2023_615_MOESM1_ESM.pdf]

# **Reprogramming an RNA-guided archaeal TnpB endonuclease for genome editing**

Ying Xu<sup>1,2,3</sup>, Tao Liu<sup>1</sup>, Jing Wang<sup>1</sup>, Binyang Xiong<sup>1</sup>, Ling Liu<sup>1</sup> and Nan Peng<sup>1,2,3\*</sup>

<sup>1</sup> National Key Laboratory of Agricultural Microbiology, Hubei Hongshan Laboratory, College of Life Science and Technology, Huazhong Agricultural University, Wuhan, 430070, P. R. China

<sup>2</sup> Shenzhen Institute of Nutrition and Health, Huazhong Agricultural University

<sup>3</sup> Shenzhen Branch, Guangdong Laboratory for Lingnan Modern Agriculture, Genome Analysis Laboratory of the Ministry of Agriculture, Agricultural Genomics Institute at Shenzhen, Chinese Academy of Agricultural Sciences, Shenzhen, China

\*Correspondence: Nan Peng ([nanp@mail.hzau.edu.cn](mailto:nanp@mail.hzau.edu.cn))

## Supplementary Materials and Methods

### Strains, culture conditions, and transformation

*S. islandicus* REY15A was cultured in SCV medium at 78°C <sup>1</sup>. *Pediococcus acidilactici* LA412 was cultured in the modified MRS medium at 37°C <sup>2</sup>. *P. acidilactici* competent cells were prepared and electroporated, as described previously <sup>2</sup>. *E. coli* DH5 $\alpha$  was used for DNA cloning. All *E. coli* strains were cultured in Luria-Bertani (LB) medium at 37°C, and erythromycin (400  $\mu$ g/ml) was added when required.

### TnpB identification from *S. islandicus*

The genome of *S. islandicus* REY15A was downloaded from NCBI GenBank (Accession No. NC\_017276.1). The IS200/IS605 and IS607 transposon families were identified from *S. islandicus* REY15A genome using ISfinder <sup>3</sup>. Then, 24 TnpB family proteins were identified from the IS200/IS605 and IS607 transposon families, and their amino acids sequences were used for phylogenetic analysis. These TnpB protein sequences from *S. islandicus* REY15A were aligned to ISDra2\_TnpB (AAF10241.1) using ClustalW with the default settings, and based on alignment results, a phylogenetic tree was constructed using MEGA7 (version 7.0.26) software by neighbor-joining method <sup>4</sup>, and iTOL was used for downstream visualization of the phylogenetic tree <sup>5</sup>.

### TAM and RE-RNA ( $\omega$ RNA) analysis

Transposon-associated motif (TAM) sequence has been reported to match the target site sequence of TnpA-mediated transposon <sup>6</sup>. The DNA sequences from -100 to +50, relative to start codon of *tnpA* genes associated with *tnpB* genes and solo *tnpB* genes were extracted for alignment. Next, the first five conserved bases were predicted to be the TAM sequences. To predict the RE-RNA ( $\omega$ RNA), nucleotide sequences within 250 bp ahead to 100 bp behind the stop codon of each *tnpB* gene were extracted for alignment. Based on the selected conserved regions,  $\omega$ RNA scaffold was predicted using the “UNAFold Web Server” with its default settings

([http://www.unafold.org/DNA\\_form.php](http://www.unafold.org/DNA_form.php))<sup>7</sup>. The 20 nt sequences located behind the conserved region at the 3' end of the  $\omega$ RNA were predicted to be the guide sequences.

### Plasmid construction

The *SistnpB1* gene (SiRe\_0632) and the predicated  $\omega$ RNA-coding DNA were amplified from *S. islandicus* REY15A genomic DNA. The *SistnpB1* gene PCR product was digested with Nde I/Sal I, purified, and cloned into pET30a to obtain plasmid pET30a-*SistnpB1*. Then, the  $\omega$ RNA-coding DNA was digested with Not I/Xho I and cloned into plasmid pET30a-*SistnpB1*. DNA oligo pairs (synthesized by Sangon Biotech, Shanghai) were annealed to generate target DNA, and obtained target DNA was cloned into pUC19 plasmid. The inverse PCR was conducted to obtain target plasmids and mutation *SistnpB1* gene plasmids using the primers carrying the mutation sequences. The PCR products were purified, treated with Dpn I, treated with recombinase, and transformed into *E. coli* DH5 $\alpha$  cells. The fluorescence oligos (synthesized by Sangon Biotech, Shanghai) were annealed in a thermo-cycler to generate linear DNA targets for subsequent *in vitro* cleavage. *SistnpB1* gene and  $\omega$ RNA-coding DNAs respectively under control of the *lacZ* gene promoter and P32 promoter were cloned into pMG36e plasmid through T5 exonuclease DNA assembly (TEDA) to obtain plasmid pSisTnpB1- $\omega$ RNA. Then, the DNA donors upstream and downstream target sites were PCR amplified from pMG36e-C-LR<sup>2</sup> and cloned into plasmid pSisTnpB1- $\omega$ RNA to generate the genome editing plasmid for deletion of *pyrE* gene.

The *SistnpB1* gene, the  $\omega$ RNA coding sequence targeting *cas6* gene and the donor DNA were cloned into *Sulfolobus* expression vector pSeSD<sup>8</sup>, resulting the *Sulfolobus* editing plasmid targeting *cas6* gene. All primers used in this study were presented in [Supplementary Table 1](#).

### Expression and purification of SisTnpB1 RNP complex

*E. coli* BL21-AI cells carrying *SistnpB1*- $\omega$ RNA expression cassette were culture in LB medium supplemented with ampicillin (100  $\mu$ g/ml) and chloramphenicol (50

μg/ml) at 37°C. After culture to an OD<sub>600</sub> of 0.6–0.8, protein expression was induced with 0.2% arabinose, and the cells were cultured overnight at 16°C. Then, the cells were harvested by centrifugation, resuspended in 20 mM Tris-HCl (pH 8.0) buffer (containing 250 mM NaCl, 5 mM 2-mercaptoethanol, 25 mM imidazole, 2 mM PMSF, and 5% (v/v) glycerol), and disrupted through high pressure. After removing cell debris by centrifugation, the supernatant was loaded onto the Ni<sup>2+</sup>-charged HiTrap chelating HP column (Cytiva, Marlborough, MA, USA). Subsequently, proteins were eluted with a gradient imidazole (concentration increasing from 25 mM to 500 mM) in the buffer containing 20 mM Tris-HCl (pH 8.0), 500 mM NaCl, 5 mM 2-mercaptoethanol, and 5% (v/v) glycerol. The protein fractions containing SisTnpB1 RNP or the mutant proteins were collected, concentrated through ultrafiltration, and separated through a Superdex 200 Increase 10/300 GL column (Cytiva, Marlborough, MA, USA) using 20 mM HEPES buffer, pH7.0, containing 500 mM NaCl, and the peaks of target proteins were analysed by SDS-PAGE. The samples containing SisTnpB1 RNP were dialysed in 20 mM Tris-HCl buffer (pH 8.0 at 25°C) and stored at -80°C or immediately used.

### **DNA cleavage assay**

Plasmid DNA and synthetic oligoduplex cleavages experiments were conducted at different temperatures (37-85°C) for 60 minutes by adding 5 nM SisTnpB1 RNP complex and 5 ng/μL plasmid DNA carrying different target sequences and TAM sequences in 10 mM Tris-HCl buffer (pH7.5) containing 1 mM DTT, 1 mM EDTA, 100 mM NaCl, with 10 mM MgCl<sub>2</sub>, MnCl<sub>2</sub>, CaCl<sub>2</sub>, ZnCl<sub>2</sub> or NiCl<sub>2</sub> added into buffer for different reactions. The reaction was stopped by adding 20 mM protease K and 4% SDS solution, and then reaction system was incubated at 37°C for 1 hour. Then, 2 × loading dye was added, and cleavage products were subjected to 1.5% agarose gel analysis or 20% denaturing PAGE electrophoresis. DNA fragments in agarose gel were visualized by ethidium bromide staining, and DNA fragments in denaturing PAGE were detected using a FUJIFILM scanner (FLA-5100). Band staining intensity was determined by densitometry, using the software ImageJ.

### Genome editing in *P. acidilactici* and *S. islandicus* cells

*P. acidilactici* colonies carrying the editing plasmids on the plates containing 5 µg/mL erythromycin were selected randomly, transferred to liquid medium containing 5 µg/mL erythromycin, and incubated at 37°C or 45°C for 12 h. These cell cultures were transferred into fresh medium containing 5 µg/mL erythromycin for the second-round incubation. The editing region was PCR amplified, and PCR products were separated on 1.5% agarose gel. The samples containing shorter bands (shown on gel, representing the successful region deletion) were subjected to DNA sequencing. Moreover, *P. acidilactici* colonies on the selection medium plates were washed into fresh medium and cultured for 1 day at 37°C. The washed cell culture or the culture after one round incubation was used as the PCR template to amplify the targeting region. Then, the PCR products were sequenced using the Illumina NovaSeq platform at Shanghai Personalbio Technology and the sequencing data were deposited in the SRA database under Accession PRJNA999174.

*Sulfolobus* editing plasmid was electroporated into *S. islandicus* E233S cells and colonies carrying the editing plasmid were selected on SCV medium plates [8](#). Single colonies were used as PCR templates to amplify the target sites. PCR products were analyzed on 1% agarose gel and the shorter bands were subjected to DNA sequencing.

### References

- 1 Deng, L., Zhu, H., Chen, Z., Liang, Y. X. & She, Q. *Extremophiles* **13**, 735-746 (2009).
- 2 Liu, L. *et al. Appl Environ Microbiol* **87**, e0094821 (2021).
- 3 Siguier, P., Perochon, J., Lestrade, L., Mahillon, J. & Chandler, M. *Nucleic Acids Res* **34**, D32-36 (2006).
- 4 Kumar, S., Stecher, G. & Tamura, K. *Mol Biol Evol* **33**, 1870-1874 (2016).
- 5 Letunic, I. & Bork, P. *Nucleic Acids Res* **49**, W293-W296 (2021).
- 6 Karvelis, T. *et al. Nature* **599**, 692-696 (2021).
- 7 Zuker, M. *Nucleic Acids Res* **31**, 3406-3415 (2003).
- 8 Peng, N. *et al. Appl Environ Microbiol* **78**, 5630-5637 (2012).



```

SiRe_0692 TTAAGAAGGATTTGACTTTGGCTGACCGTATATTCTCATGTCCTAAATGTGGTTGGACT
SiRe_0774 TTAAGAAGGACTTGACTTTGGCTGACCGTGTGTTTGTATGTCCTAAATGTGGTTGGACT
SiRe_0632 TTAAGAAGGACTTGGCTTTGGCTGACCGTGTGTTTGTATGCCCTGAGTGC GGTTGGACT
SiRe_2474 TTAAGAAGGACTTGGCTTTGGCTGACCGTGTGTTTGTATGCCCCAAGTGTGGTTGGACT
SiRe_0736 TTAAGAAGGACCTGGCTTTGGCTGACCGTGTGTTTGTATGCCCCAAGTGTGGTTGGGCT
SiRe_2613 TTAAGAAGGATTTGACTTTGGCTGACCGTGTGTTTGTATGTCCCAAGTGTGGTTGGACT
SiRe_0408 TTAAGAAGGACTTGGCTTTGGCTGACCGTGTGTTTGTATGTCCCAAGTGTGGTTGGGCT
          ***** ** ***** * ** *** * * ** ***** **

SiRe_0692 GTAGATCGTGACTATAATGCTTCTCTAAATATTCTTCATGCGGGGTCGGGACAGCCCTTA
SiRe_0774 GTAGATCGTGACTATAATGCTTCTCTAAATATTCTTCGTGCGGGGTCGGGACTGCCCTTA
SiRe_0632 GTAGATCGTGACTATAATGCTTCTCTAAATATTCTTCGTGCGGGGTCGGGACTGCCCTTA
SiRe_2474 GTAGATCGTGACTATAATGCTTCTCTAAATATTCTTCGTGCGGGGTCGGGACTGCCCTTA
SiRe_0736 GTAGATCGTGACTATAATGCTTCTCTAAATATTCTTCGTGCGGGGTCGGGACAGCCCTTA
SiRe_2613 GTAGACCGTGACTATAATGCTTCTCTAAATATTCTTCATGCGGGGTCGGGACAGCCCTTA
SiRe_0408 GTAGATCGTGACTATAATGCTTCTCTAAATATTCTTCATGCGGGGTCGGGACAGCCCTTA
          ***** ***** ***** ***** *****

SiRe_0692 GAGCCTGTGGACAGGAGACCTCTGCTATACATTCCCTTCTCTGAGGGTGTGTATAGTAAG
SiRe_0774 GAGCCTGTGGACAGGGGACCTCTGCTATACATTCCCTTCTCAGAAGGGGTGTATAGTAAG
SiRe_0632 GAGCCTGTGGACAGGGGACCTCTGCTATACATTCCCTTCTCTGAGGGTGTGTATAGTAAG
SiRe_2474 GAGCCTGTGGACAGGGGACCTCTGCTATACATACCCTTCTCTGAGGGTGTGTATAGTAAG
SiRe_0736 GAGCCTGTGGACAGGGGACCTCTGCTATACATACCCTTCTCTGAGGGTGTGTATAGTAGG
SiRe_2613 GAGCCTGTGGACAGGGGACCTCTGCTATACATACCCTTCTCTGAGGGTGTGTATAGTAAG
SiRe_0408 GAGCCTGTGGACAGGGGACCTCTGCTATACATACCCTTCTCTGAGGGTGTGTATAGTAGG
          ***** ***** ***** ** * ***** *

SiRe_0692 TTTCTTGGAAGAAGCAGGAAATCTCCATCGTGAGGTGGAGATGCCCGTCCGTAAGGGCT
SiRe_0774 TTTCTTGGAAGAAGCAGGAAATCTCCATCGTGAGGTGGAGATGCCACGTCCGTAAGGGCG
SiRe_0632 TTTCTTGGAAGAAGCAGGAAATCTCCATCGTGAGGTGGAGATGCCACGTCCGTAAGGGCG
SiRe_2474 TTTCTTGGAAGAAGCAGGAAATCTCCATCGTGAGGTGGAGATGCCACGTCCGTAAGGGCG
SiRe_0736 TTTCTTGGAAGAAGCAGGAAATCTCCATCGTGAGGTGGAGATGCCACGTCCGTAAGGGCG
SiRe_2613 TTTCTTGGAAGAAGCAGGAAATCTCCATCGTGAGGTGGAGATGCCACGTCCGTAA-GGCG
SiRe_0408 TTTCTTGGAAGAAGCAGGAAATCTCCATCGTGAGGTGGAGATGCCACGTCCGTAAGGGCG
          **** ***** ***** ***** *****

SiRe_0692 GGGTTGTTTAC TTTATTAGAGGTATTATTAT
SiRe_0774 GGGTTGTTTAC CGGTTTTTTATTGCCTAGTAT
SiRe_0632 GGGTTGTTTAC TATATCATAACCGAATTTTC
SiRe_2474 GGGTAGTTTAC TAGGGACAAGACGAATAGGC
SiRe_0736 GGGTAGTTTAC AAGCTAGTAATAATGAAGAT
SiRe_2613 GGGTTGTTTAC GTAGAGTTTACAGATTTATA
SiRe_0408 GGGTTGTTTAC TAGGTTTGTCTATTTTTTCT
          **** ***** guide sequence

```

**Supplementary Figure 2. Identification of  $\omega$ RNA sequences.** The  $\omega$ RNA sequences located at the 3'-end of *tnpB* genes associated with *tnpA* gene were aligned, and the guide sequences were boxed.

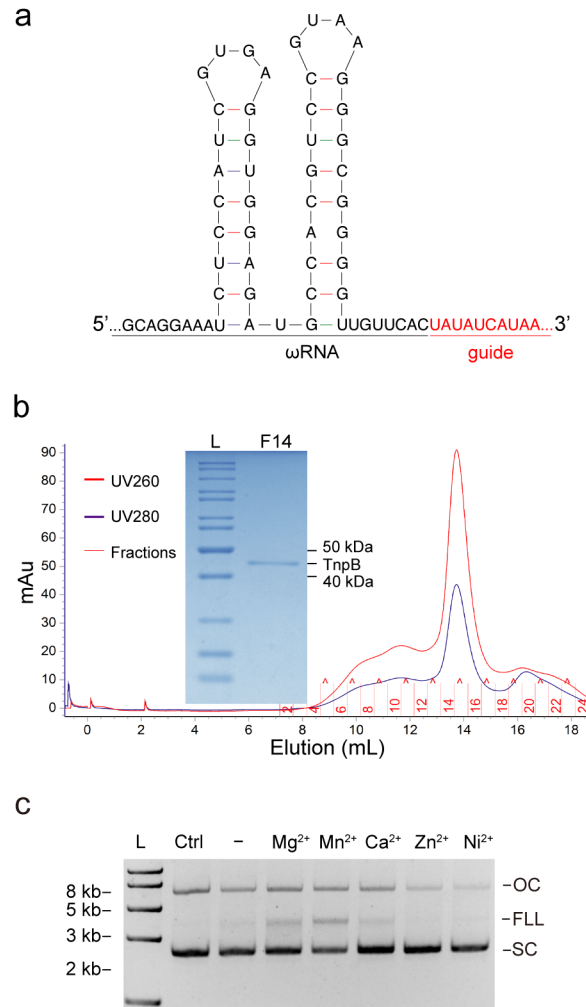

**Supplementary Figure 3. *In vitro* DNA cleavage by SisTnpB1 RNP. (a)** Predicted structure of  $\omega$ RNA from the RE of SiRe\_0632 *tnpB* gene. **(b)** Purification of SisTnpB1 RNP from *E. coli*. Gel filtration profile of SisTnpB1 RNP and SDS-PAGE analysis of fraction 14 from gel filtration. L: protein ladder; F14, fraction 14. **(c)** metal ion-dependent endonuclease activity of SisTnpB1. DNA cleavage experiment was carried out at 37°C because the presence of Mn<sup>2+</sup> at 75°C caused DNA degradation.



|            |                                                                             |     |
|------------|-----------------------------------------------------------------------------|-----|
| ISDra2TnpB | MIRNK-----AFVVRLYPNAAQTELINRTLGSARFVYNHFLARRIAAYKESGKGLTY                   | 52  |
| SisTnpB1   | MWRAKEKNDKTQLSFKYKIYPTREVEEKLKVMQIEAKVYNALLD-VINNARKEGKKITP                 | 59  |
|            | * * * : * . : * * . * : . . : * * * : * * . . : * * : *                     |     |
| ISDra2TnpB | GQTSSSELTLLKQAEETSWLSEVDKFALQNSLKNLETAYKNFFRTVKQSGKKVGFPRFRKK               | 112 |
| SisTnpB1   | KDTQNMLKELKIEGKELVYSKALQMVNNQLWSNI-----NALHELKKKGKKVGLRYKKI                 | 114 |
|            | : * . . * . * * : * : . : . : . : * : * : . : * : * * * * * * * : * . *     |     |
| ISDra2TnpB | RTGESYRTQFTNNNIQIGEGRLKLPKLGWVKTKGQDDIQGKILNVTVRRRIHEGHYEASVL               | 172 |
| SisTnpB1   | LK----IINYNQSGFKVEGDKLILSKIGEIKVLFHRPLEGEIKGVIIKKSSSTGWY-AIFQ               | 169 |
|            | . : . . . . . : . * * . * * : * . : . : * * * * * . * * * .                 |     |
| ISDra2TnpB | CEVEIPYLPAAPKFAAGVDVGIKDFAIVTDGVRFKHEQNPKYYRSTLKRRLKAQQTLSRR                | 232 |
| SisTnpB1   | VEVEKKPLEKAGK-VVGIDLGVDKLVTTSDGVVI---ENPKVFDKVERRIKILQKSLSRK                | 225 |
|            | * * * * * * * . . : * : * : . . : * * * : : * * * : . . . * : . * : * * * . |     |
| ISDra2TnpB | KKGSARYGKAKTKLARIHKRIVNKRQDFLHKLTTSLVREYEIIGTEHLKPDNM---RKNR                | 289 |
| SisTnpB1   | KKGSRNYEKVRKKLAKLHEHVKNLMSDYIHKVTSWLVEEYDEIYVEDLDVKDIVEDSESK                | 285 |
|            | * * * * . * * . . . * * * : * : . : * * : * * * : * * * : * * * . . : . .   |     |
| ISDra2TnpB | RLALSISDAGWGEFIRQLEYKAAWYGRLVSKVSPYFPSSQLCHDCGFKNPEVKNLAVRTW                | 349 |
| SisTnpB1   | VLRKHILHSDFSKFSYLSYKAERAGRRVVKVDPR-NTSKTCARCGYVKKDL-ALADRVF                 | 343 |
|            | * * : . . : * : * . * * * . * * * * * * : * : * * * : : * * * . :           |     |
| ISDra2TnpB | TCPNCGETHDRDENAALNIRREALVAAGISDTLNAHGGYVR-PASAGNGLRSENHATLVV                | 408 |
| SisTnpB1   | VCPECGWTVD RDYNASLNILR---AGSGLPLEPVDRGPLYIPFSEGVSYSKFLGRSRKSP               | 400 |
|            | . * * : * * * * * * * * : * * * * . . : * : . * : * * * . . :               |     |
| ISDra2TnpB | -                                                                           |     |
| SisTnpB1   | S                                                                           |     |

**Supplementary Figure 4. Analysis of ISDra2 TnpB and SisTnpB1 proteins using CLUSTAL multiple sequence alignment.** Conserved amino acid residues in the putative RuvC domains were boxed.

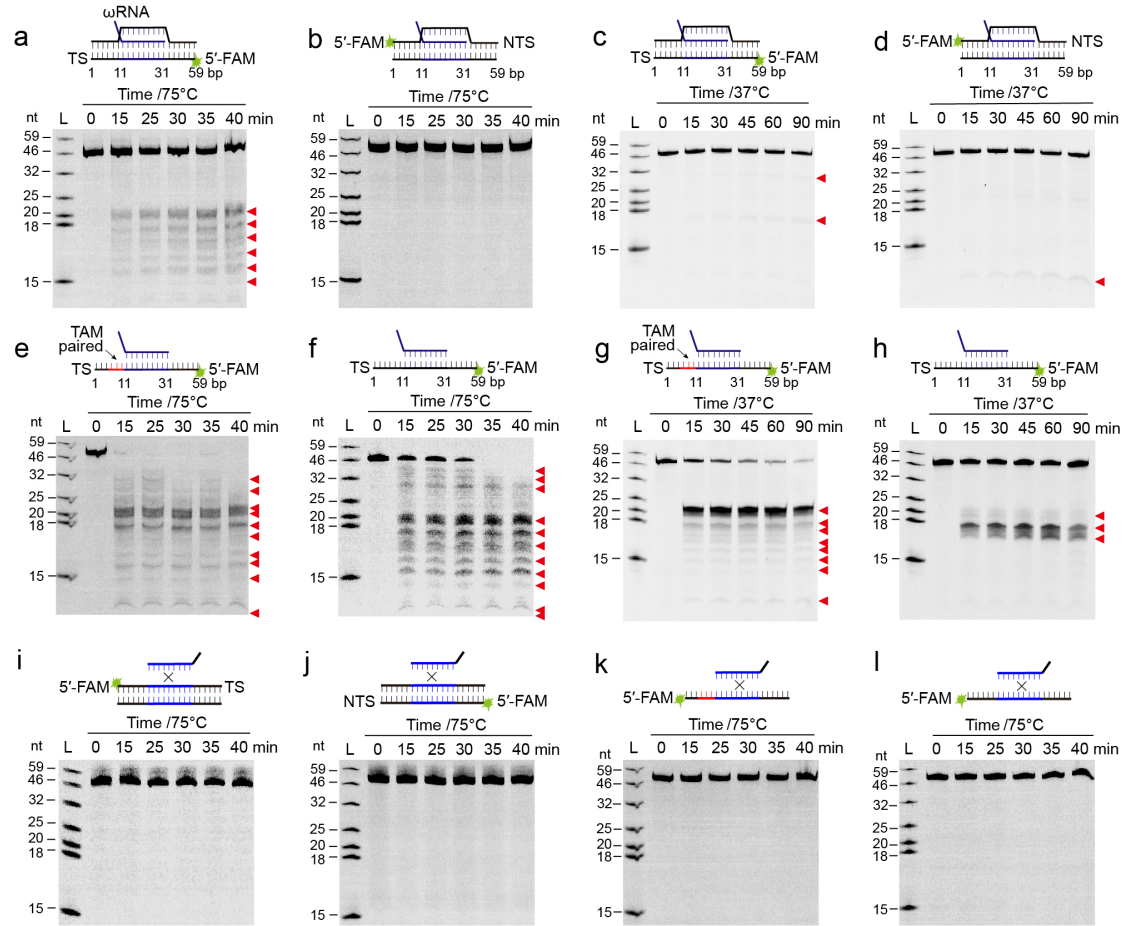

**Supplementary Figure 5. SisTnpB1 cleaves both dsDNA and ssDNA.** (a - d) 20% denaturing PAGE analysis of 59-bp target dsDNA carrying no TAM cleaved by SisTnpB1 RNP at 75°C (a and b) or 37°C (c and d). (e - h) 20% denaturing PAGE analysis of SisTnpB1 RNP-cleaved 59 nt target ssDNA carrying TAM-paired sequence (e and g) or without TAM (f and h) at 75°C (e and f) or 37°C (g and h). ssDNAs were FAM-labelled at all 5'ends. Cleaved products were indicated by red triangles. 20% denaturing PAGE analysis of SisTnpB1 RNP-cleaved 59-bp dsDNA (i and j) or 59-nt ssDNA (k and l) without matching sequence at 75°C. Target strands (i, k and l) or non-target strand (j) were FAM-labelled at 5'-end. TAM sequence is indicated in red. The matching sites (11 and 39 bp) between the guide of  $\omega$ RNA and the target as well as the length of the target DNA (59 bp) were labeled.

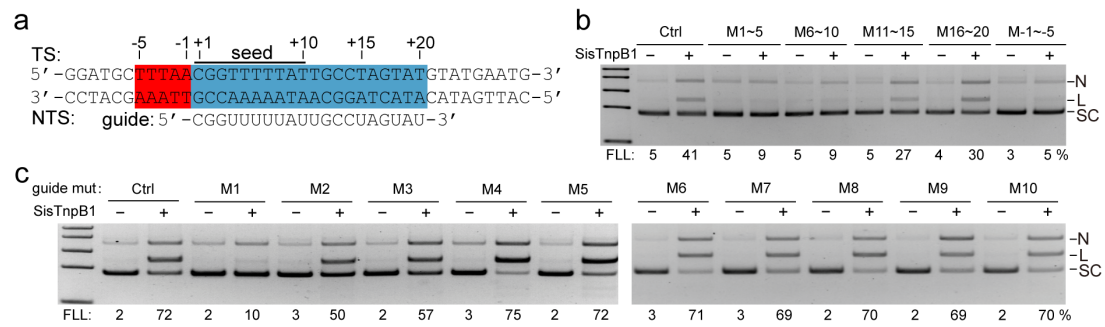

**Supplementary Figure 6. Effects of seed and TAM sequence variation on SisTnpB1 endonuclease activity.** (a) Schematic of the target dsDNA sequence in the plasmid and guide RNA sequence of the  $\omega$ RNA. TAM and guide-matching sequences were boxed by red and light blue rectangles, respectively. The location of bases in the TAM and target sequences were labeled by numbers. (b) Agarose gel analysis of SisTnpB1 RNP-cleaved products from the substrate plasmid with transversion mutations at the target DNA sequence or TAM sequence. Numbers indicated the mutation regions. (c) Agarose gel analysis of the SisTnpB1 RNP-cleaved products from the substrate plasmid with single transversion mutations at the target DNA sequence. Quantitation of FLL cleavage products were indicated below the lanes.

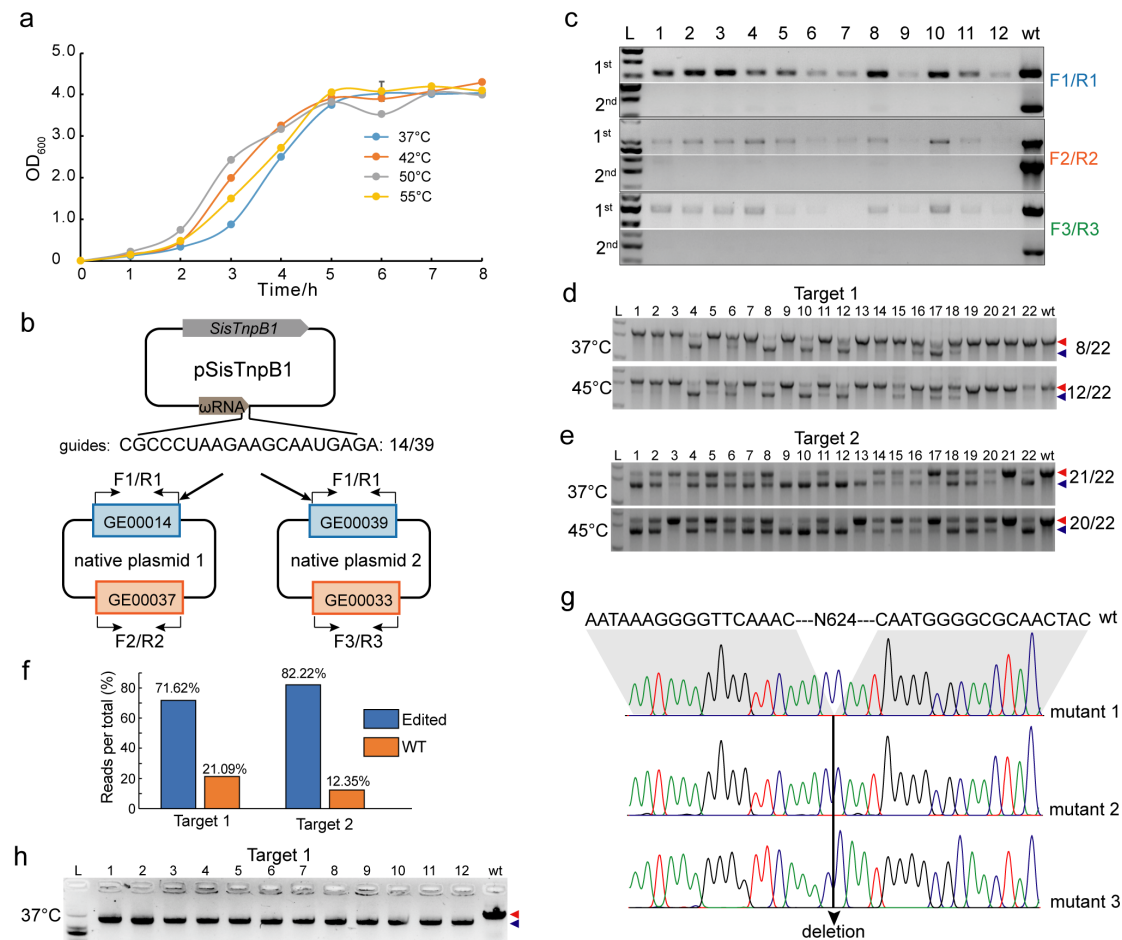

**Supplementary Figure 7. Harnessing SisTnpB1 for *in vivo* DNA interference and genome editing in *Pedococcus acidilactici*.**

**(a)** Growth curves of *P. acidilactici* LA412 strain at different temperatures in liquid modified MRS medium. Data are expressed as the mean  $\pm$  SD of three technical replicates. **(b)** Schematic of pMG36e-based plasmid interference. Interference plasmid encodes *SistnpB1* gene and the  $\omega$ RNA, thus targeting GE00014 of endogenous plasmid 1 and GE00039 gene of endogenous plasmid 2. Primer pairs F1/R1, F2/R2, and F3/R3 were used to amplify GE00014/GE00039 gene, GE00037 gene, and GE00033 gene, respectively. **(c)** Agarose gel analysis of PCR products from randomly selected colonies (1<sup>st</sup>) or those after one-round passage (2<sup>nd</sup>). The primer pairs F1/R1, F2/R2, and F3/R3 were used for PCR amplification. Agarose gel analysis of PCR products of the target 1. **(d)** and target 2 **(e)** on *pyrE* gene from randomly selected transformants cultured at 37°C or 45°C. The number on the right of gel bands indicate the editing efficiencies. **(f)** Percentage of the edited reads (an accurate 624-bp deletion) and wildtype (WT) reads per total reads from the PCR products amplifying the target sites of the transformants carrying the editing plasmids after one round passage in antibiotic medium at 37°C. **(g)** Sanger sequencing of PCR products from three more *pyrE* deletion single mutants (mutant 1 to 3) carrying the editing plasmid targeting site 1. The black triangle indicates the site of a 624-bp deletion. **(h)** Agarose gel analysis of PCR products of the target 1 on *pyrE* gene from the colonies spread on MRS plates after a second- or third-round passage of a transformant in the fresh MRS medium containing 5  $\mu$ g/mL

erythromycin. Red and blue triangles denote wildtype band and deletion band, respectively. L, DNA ladder; numbers on the top of the gels: randomly selected transformants; wt: wildtype cell control.

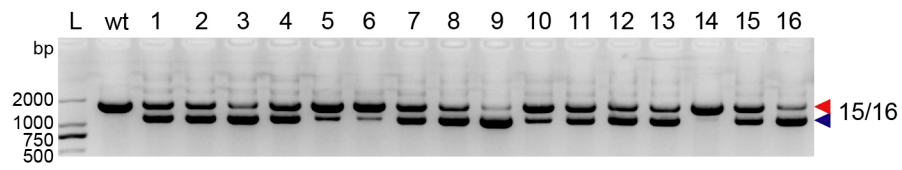

**Supplementary Figure 8. Harnessing SisTnpB1 for *cas6* gene deletion in *Sulfolobus islandicus*.** Agarose gel analysis of PCR products from randomly selected 16 colonies carrying the editing plasmid. Red and blue triangles denote wildtype band (1764 bp) and deletion band (1162 bp), respectively. L, DNA ladder; numbers on the top of the gels: randomly selected transformants; wt: wildtype cell control.

**Supplementary Table 1: primers and oligonucleotides used in this study**

| Primers and nucleotides                            | Sequence (5' to 3')                                              |
|----------------------------------------------------|------------------------------------------------------------------|
| <b>Primers for SisTnpB1 cloning and expression</b> |                                                                  |
| SiRe0632-F-Nde I                                   | CGCCATATGCATCACCATCACCACCATCATCACTGGAGAGCCAA<br>GGAGAAGAATG      |
| SiRe0632-R-Sal I                                   | CGCGTCGACGCTATAACACCAGCTTGCTCAGTTA                               |
| ωRNA-F-Not I                                       | ATTGCGGCCGCTAATACGACTCACTATAGGGTTAAGAAGGACTT<br>GACTTTG          |
| ωRNA-R                                             | GTCGACATACTAGGCAATAAAAACCG                                       |
| SOE ωRNA -HDV-F:                                   | TTATTGCCTAGTATGTCGACGGCCGGCATGGTCCCAGCCTCCTC<br>GCTGGCGCCGGCTG   |
| SOE ωRNA Xho I+HDV-R:                              | GGCTCGAGGTCCCATTGCGCCATGCCGAAGCATGTTGCCAGCCG<br>GCGCCAGCGAGGAG   |
| TnpB-D187A-F                                       | TTGGAATAGCCCTAGGAGTGGATAAACTAG                                   |
| TnpB-D187A-R                                       | CACTCCTAGGGCTATTCCAACCACTTTCCC                                   |
| TnpB-E271A-F                                       | TATACGTGGCAGATCTTGATGTAAAGGATA                                   |
| TnpB-E271A-R                                       | ATCAAGATCTGCCACGTATATCTCATCATA                                   |
| TnpB-D355A-F                                       | AGATCGTGCCTATAATGCTTCTCTAAATAT                                   |
| TnpB-D355A-R                                       | AAGCATTATAGGCACGATCTACAGTCCAAC                                   |
| <b>Oligonucleotides for dsDNA and ssDNA</b>        |                                                                  |
| DNA-Target-F(5'FAM)                                | AGCTTTATATTAGAGATAGCATTTCATACATACTAGGCAATAAAA<br>ACCGTTAAAGCATCC |
| DNA-Target-R(5'FAM)                                | GGATGCTTTAACGGTTTTTATTGCCTAGTATGTATGAATGCTATC<br>TCTAATATAAAGCT  |
| DNA-target-NoTAM-F(5'FAM)                          | AGCTTTATATTAGAGATAGCATTTCATACATACTAGGCAATAAAA<br>ACCGAATTTGCATCC |
| DNA-target -NoTAM-R(5'FAM)                         | GGATGCAAATTCGGTTTTTATTGCCTAGTATGTATGAATGCTAT<br>CTCTAATATAAAGCT  |
| DNA-NonTarget-F(5'FAM)                             | CTAGGGCGCGGCTCTCGCTACGGACGCACGCAGCTTACCGCCCC<br>CAATGGCCCTACGAA  |
| DNA-NonTarget-R(5'FAM)                             | TTCGTAGGGCCATTGGGGGCGGTAAGCTGCGTGCGTCCGTAGCG<br>AGAGCCGCGCCCTAG  |
| <b>Primers for construction of target plasmids</b> |                                                                  |
| pTarget-F-NdeI                                     | TATGTTTAAACGGTTTTTATTGCCTAGTATG                                  |
| pTarget-R-SalI                                     | TCGACATACTAGGCAATAAAAACCGTTAAACA                                 |
| pTarget-F-NoTAM-NdeI                               | TATGAAATTCGGTTTTTATTGCCTAGTATG                                   |
| pTarget-R-NonTAM-SalI                              | TCGACATACTAGGCAATAAAAACCGAATTTCA                                 |
| <b>Primers for seed and TAM sequence variation</b> |                                                                  |
| Mut1~5-F                                           | TATGTTTAAAGCCAATTTATTGCCTAGTATG                                  |
| Mut1~5-R                                           | TCGACATACTAGGCAATAAATTGGCTTAAACA                                 |
| Mut2-F                                             | TATGTTTAAACGGTTAAATATGCCTAGTATG                                  |
| Mut2-R                                             | TCGACATACTAGGCATATTTAAACCGTTAAACA                                |

|            |                                   |
|------------|-----------------------------------|
| Mut3-F     | TATGTTTAACGGTTTTTATACGGAAGTATG    |
| Mut3-R     | TCGACATACTCCGTATAAAAACCGTTAAACA   |
| Mut4-F     | TATGTTTAACGGTTTTTATTGCCTTCATAG    |
| Mut4-R     | TCGACTATGAAGGCAATAAAAACCGTTAAACA  |
| Mut-5~-1-F | TATGAAATTCGGTTTTTATTGCCTAGTATG    |
| Mut-5~-1-R | TCGACATACTAGGCAATAAAAACCGAATTCA   |
| TAM-5A-F   | TATGATTAACGGTTTTTATTGCCTAGTATG    |
| TAM-5A-R   | TCGACATACTAGGCAATAAAAACCGTTAATCA  |
| TAM-5C-F   | TATGCTTAACGGTTTTTATTGCCTAGTATG    |
| TAM-5C-R   | TCGACATACTAGGCAATAAAAACCGTTAAGCA  |
| TAM-5G-F   | TATGGTTAACGGTTTTTATTGCCTAGTATG    |
| TAM-5G-R   | TCGACATACTAGGCAATAAAAACCGTTAACCA  |
| TAM-4C-F   | TATGTCTAACGGTTTTTATTGCCTAGTATG    |
| TAM-4C-R   | TCGACATACTAGGCAATAAAAACCGTTAGACA  |
| TAM-4G-F   | TATGTGTAACGGTTTTTATTGCCTAGTATG    |
| TAM-4G-R   | TCGACATACTAGGCAATAAAAACCGTTACACA  |
| TAM-4A-F   | TATGTATAACGGTTTTTATTGCCTAGTATG    |
| TAM-4A-R   | TCGACATACTAGGCAATAAAAACCGTTATACA  |
| TAM-3G-F   | TATGTTGAACGGTTTTTATTGCCTAGTATG    |
| TAM-3G-R   | TCGACATACTAGGCAATAAAAACCGTTCAACA  |
| TAM-3C-F   | TATGTTCAACGGTTTTTATTGCCTAGTATG    |
| TAM-3C-R   | TCGACATACTAGGCAATAAAAACCGTTGAACA  |
| TAM-3A-F   | TATGTTAAACGGTTTTTATTGCCTAGTATG    |
| TAM-3A-R   | TCGACATACTAGGCAATAAAAACCGTTTAAACA |
| TAM-2C-F   | TATGTTTCACGGTTTTTATTGCCTAGTATG    |
| TAM-2C-R   | TCGACATACTAGGCAATAAAAACCGTGAAACA  |
| TAM-2G-F   | TATGTTTGACGGTTTTTATTGCCTAGTATG    |
| TAM-2G-R   | TCGACATACTAGGCAATAAAAACCGTCAAACA  |
| TAM-2T-F   | TATGTTTTACGGTTTTTATTGCCTAGTATG    |
| TAM-2T-R   | TCGACATACTAGGCAATAAAAACCGTAAAACA  |
| TAM-1C-F   | TATGTTTACCGGTTTTTATTGCCTAGTATG    |
| TAM-1C-R:  | TCGACATACTAGGCAATAAAAACCGGTAAACA  |
| TAM-1G-F:  | TATGTTTAGCGGTTTTTATTGCCTAGTATG    |
| TAM-1G-R:  | TCGACATACTAGGCAATAAAAACCGCTAAACA  |
| TAM-1T-F   | TATGTTTATCGGTTTTTATTGCCTAGTATG    |
| TAM-1T-R   | TCGACATACTAGGCAATAAAAACCGATAAACA  |
| Mut1-F     | TATGTTTAAGGGTTTTTATTGCCTAGTATG    |
| Mut1-R     | TCGACATACTAGGCAATAAAAACCGTTAAACA  |
| Mut2-F     | TATGTTTAACCGTTTTTATTGCCTAGTATG    |
| Mut2-R     | TCGACATACTAGGCAATAAAAACGGTTAAACA  |
| Mut3-F     | TATGTTTAACGCTTTTTTATTGCCTAGTATG   |
| Mut3-R     | TCGACATACTAGGCAATAAAAAGCGTTAAACA  |
| Mut4-F     | TATGTTTAACGGATTTTTATTGCCTAGTATG   |



|                                                                        |                                                                 |
|------------------------------------------------------------------------|-----------------------------------------------------------------|
| Mut4-R                                                                 | TCGACATACTAGGCAATAAAATCCGTAAACA                                 |
| Mut5-F                                                                 | TATGTTTAACGGTATTTATTGCCTAGTATG                                  |
| Mut5-R                                                                 | TCGACATACTAGGCAATAAATACCGTAAACA                                 |
| Mut6-F                                                                 | TATGTTTAACGGTATTATTGCCTAGTATG                                   |
| Mut6-R:                                                                | TCGACATACTAGGCAATAATAACCGTAAACA                                 |
| Mut7-F                                                                 | TATGTTTAACGGTTTATATTGCCTAGTATG                                  |
| Mut7-R                                                                 | TCGACATACTAGGCAATATAAACCGTAAACA                                 |
| Mut8-F                                                                 | TATGTTTAACGGTTTTAATTGCCTAGTATG                                  |
| Mut8-R                                                                 | TCGACATACTAGGCAATTA AACCGTAAACA                                 |
| Mut9-F                                                                 | TATGTTTAACGGTTTTTTTTGCCTAGTATG                                  |
| Mut9-R                                                                 | TCGACATACTAGGCAAAAAAACCGTAAACA                                  |
| Mut10-F                                                                | TATGTTTAACGGTTTTTAATGCCTAGTATG                                  |
| Mut10-R                                                                | TCGACATACTAGGCATTAAAAACCGTAAACA                                 |
| <b>Primers for DNA targeting and genome editing in bacterial cells</b> |                                                                 |
| pMG36e-0632-F                                                          | ATCCTCTTCATCCTCTTCGTCTTGGCCCCTTCAGCTTGAGCTCGT                   |
| pMG36e-0632-R                                                          | CGATCGACCCATATTTAAAAAGCTAGCTATAACACCAGCTTGCT<br>C               |
| PlacZ-SOE36e-F                                                         | ATCCTCTTCATCCTCTTCGTCTTGGCCCCTTCAGCTTGAGCTCGT                   |
| PlacZ-SOE0632-R                                                        | TGGTGGTGATGGTGATGCATAATATCCATTCCCTTCATT                         |
| pMG36e-inverse-TEDA-0632-F                                             | TAGCTTTTTAAATATGGGTCGATCG                                       |
| pMG36e-inverse-TEDA-0632-R                                             | CCAAGACGAAGAGGATGAAGAGGAT                                       |
| pMG36e-inverse-TEDA- $\omega$ RNA-F                                    | GCGAATGGGACTGCAGTGCATGAGAGCAAAAAAGAGGAGCCG                      |
| pMG36e-inverse-TEDA- $\omega$ RNA-R                                    | GTCCTTCTTAATCTAGAGCATCTAGAGGATCGATCCCCGGGC                      |
| $\omega$ RNA-F                                                         | TGCTCTAGATTAAGAAGGAC                                            |
| SOEguide1- $\omega$ RNA-R                                              | CCGATCACCGTTGCCGTCGGGTGAACAACCCCGCCCTTAC                        |
| SOEguide1+HDV-F                                                        | CCGACGGCAACGGTGATCGGGGCCGGCATGGTCCCAGCCTCCT<br>CGCTGGCGCCGGCTGG |
| HDV-R                                                                  | TGCACTGCAGTCCCATTCGCCATGCCGAAGCATGTTGCCAGCC<br>GGCGCCAGCGAGGAG  |
| SOEguide2- $\omega$ RNA-R                                              | TTGCGTAGCTAAATGATCAAGTGAACAACCCCGCCCTTAC                        |
| SOEguide2+HDV-F                                                        | TTGATCATTTAGCTACGCAAGGCCGGCATGGTCCCAGCCTCCTC<br>GCTGGCGCCGGCTGG |
| pyrEdonor-Left-F                                                       | GGCTGGGGGGCATGGACGTC                                            |
| pyrEdonor-Right-R                                                      | TTTCAGACTTTGCAAGCTTACCCGCAAAGTAGACTTGTG                         |
| guide@native plasmid-F                                                 | CGCCCTAAGAAGCAATGAGAGGCCGGCATGGTCCCAGCCT                        |
| guide@native plasmid-R                                                 | TCTCATTTGCTTCTTAGGGCGGTGAACAACCCCGCCCTTACGGAC<br>G              |
| F1                                                                     | TTATTCGGGTTGTTTGCCG                                             |
| R1                                                                     | TTGGACTTTTCCACAGCCCA                                            |

|                     |                                                                 |
|---------------------|-----------------------------------------------------------------|
| F2                  | TTAATGACGTAAATTAAGCAAGAAGATCTCG                                 |
| R2                  | ATGAGCACCACTATTTTATCATTCCA                                      |
| F3                  | TTGGCAGTTAAGAGTATTGGATCAGG                                      |
| R3                  | TCACAAACATTGAACATTTTGTAGCCG                                     |
| pyrE-verification-F | TGAGCAGTTACAAAACGCGCT                                           |
| pyrE-verification-R | GGCCGATAAGTACCGTAGTCAGC                                         |
| pSeSD-cas6-F        | GAATGAGGTGAAGCTCAATGTGGAGAGCCAAGGAGAA                           |
| pSeSD-cas6-R        | TTACGGTTATAACTCATATCACGATGGAGATTTCTCTGC                         |
| RNAcas6L-F          | ATTTGGCATTCTTTCTAATGCGTGGTGAGTATTTATACCATT                      |
| Cas6r-R             | GGTGATGATGATGTGCTATTATTACTTTGATCTTTTATAT                        |
| 7d-F(NdeI)          | TATGAGTTATAACCGTAAAGTATATTTAAGAGAGTAACATAAG<br>GATAACTTGAAGAG   |
| 7d-R(SalI)          | TCGACTCTCAAGTTATCCTTATGTTACTCTCTTAAATATACTTT<br>ACGGTTATAACTCA  |
| 7D-TEDA-RNA-F       | ATAAGGATAACTTGAAGAGTTAAGAAGGACTTGACTTTGGCT                      |
| 7D-TEDA-RNA-R       | GGTATAAATACTCACCACGCATTAGAAAGAATGCCAAATGTGA<br>ACAACCCCGCCCTTAC |
| cas6-verification-F | GGCTTTGGATAGCTAGAAAG                                            |
| cas6-verification-R | ACTTGGGCGGAATCTATTAG                                            |
